# Supplementary material
Source: PubMed Central journal article supplement (PMC4836410)
Supplement: AEM.00351-16_zam999117118so1.pdf [file AEM.00351-16_zam999117118so1.pdf]

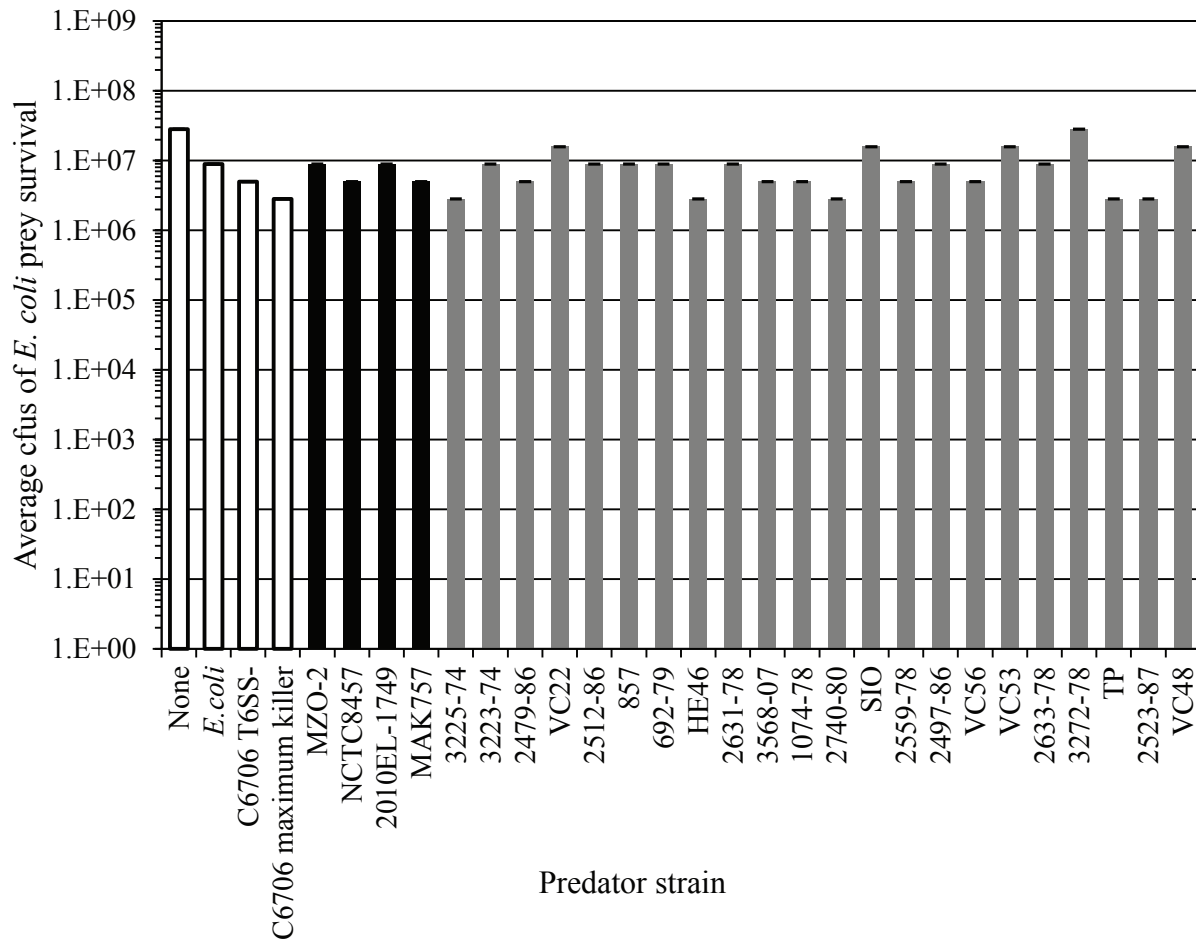

FIG S1. Bacterial killing requires contact. Chloramphenicol resistant *E. coli* prey were incubated with *V. cholerae* predator strains separated by a 0.22- $\mu$ m filter to measure contact dependence of killing. Prey alone (“None”), isogenic *E. coli* control, and negative (“C6706 T6SS”) and positive (“C6706 maximum killer”) controls are represented by white bars. Shown are average prey survival values  $\pm$  standard deviation after triplicate encounters of *E. coli* prey with *V. cholerae* clinical isolates (black bars) and environmental isolates (grey bars) for all isolates that demonstrated constitutive killing previously. One representative experiment is shown of three performed.

TABLE S1: List of strains used in this study and the lab from which they were acquired

| Strains used in this study                                                                                                                                                                                                                                                                                                                                                      | Source                                                                |
|---------------------------------------------------------------------------------------------------------------------------------------------------------------------------------------------------------------------------------------------------------------------------------------------------------------------------------------------------------------------------------|-----------------------------------------------------------------------|
| C6706                                                                                                                                                                                                                                                                                                                                                                           | Lab stocks                                                            |
| C6706 TfoX*                                                                                                                                                                                                                                                                                                                                                                     |                                                                       |
| C6706 $\Delta$ <i>cytR</i>                                                                                                                                                                                                                                                                                                                                                      |                                                                       |
| C6706 TfoX* HapR* QstR* CytR <sup>+</sup> (C6706 maximum killer)                                                                                                                                                                                                                                                                                                                |                                                                       |
| C6706 TfoX* HapR* QstR* CytR <sup>+</sup> $\Delta$ <i>vasK</i> (C6706 T6SS <sup>-</sup> )                                                                                                                                                                                                                                                                                       |                                                                       |
| *denotes constitutive expression of corresponding gene                                                                                                                                                                                                                                                                                                                          |                                                                       |
| 2010EL-1749, 2012V-1001, 3582-05, 3566-08, 3541-04, 3558-04, 2011V-1043, 3500-05, 3546-06, 2011EL-1141, 3554-08, 2009V-1085, 2009V-1096, 2011EL-1137, 2009V-1046, 2011EL-1938, Nepal 25, 2010EL-1786, Nepal 14, 2010EL-1941, 2010V-1014, 2011EL-1939, 2633-78, 2631-78, E8498, 2479-86, 3223-74, 3272-78, 1074-78, 2559-78, 2512-86, 3225-74, 692-79, 1496-86, 2497-86, 2523-87 | C. Tarr and C. Bopp,<br>Centers for Disease Control<br>and Prevention |
| NCTC8457, MZO-2, MAK757, CA401, O395, MO10, 857, 2740-80                                                                                                                                                                                                                                                                                                                        | J. Zhu,<br>University of Pennsylvania                                 |
| VC56, VC22, VC53, VC48                                                                                                                                                                                                                                                                                                                                                          | A. DePaulo,<br>Food and Drug<br>Administration                        |
| SIO, TP                                                                                                                                                                                                                                                                                                                                                                         | D. Bartlett,<br>Scripps Institution of<br>Oceanography                |
| HE46                                                                                                                                                                                                                                                                                                                                                                            | R. Colwell,<br>University of Maryland                                 |

TABLE S2. Sequences of primers used in cloning experiments during this study.

| Primer | Sequence, 5'→3'                                                            |
|--------|----------------------------------------------------------------------------|
| pQT_1  | AGTTGTCAGCAGCGTTAAGTTAAAGGATCCAGGAGCTAAGGAAGCTAAAATGCA<br>ACGAGCCAACCTATGC |
| pQT_2  | ATAAAGCTTGCTCAATCAATCACCTTACAGTAAATTTTGATTAACCCAAGC                        |
| pQT_3  | TTGACAATTAATCATCGGCTCG                                                     |
| pQT_4  | TTTTTTCACAAAACGGTTTACAAGC                                                  |
| vasK_1 | AATTCCCGGGAGAGCTCGATATCGGGATGAGTTACACCATTGCC                               |
| vasK_2 | AAAACCTCGCTCTGGCAACCTAGAATTGTGTCCTTGTTTACTCTG                              |
| vasK_3 | CAGAGTAAACAAGGACACAATTCTAGGTTGCCAGAGCGAGTTTT                               |
| vasK_4 | CAGGTCGACGGATCCCAAGCCAGCTGATGTAACCGCTCG                                    |
| vasK_5 | CCGAGTTTAGTGGAACAAATTC                                                     |
| vasK_6 | CAACTTCGTCCTAAAAAGCCAG                                                     |

TABLE S3. Pearson correlation matrix generated from principal component analysis (PCA) on clinical and environmental data, clinical data only, or environmental data only. Each variable was assessed for its correlation with all other variables. Variables include clinical (C) or environmental (E), year of isolation, serogroup, CTX status, chitinase activity (Chi), natural transformation (TF), and fold reduction in prey survival due to contact-dependent constitutive bacterial killing (Killing). Values in bold represent a correlation between variables that are different from 0 with a significance level  $\alpha \leq 0.05$ .

|                            | Variables | C/E           | Year   | Serogroup | CTX           | Chi    | TF           | Killing       |
|----------------------------|-----------|---------------|--------|-----------|---------------|--------|--------------|---------------|
| Clinical and Environmental | C/E       | -----         | -0.252 | 0.351     | <b>-0.778</b> | -0.105 | 0.088        | 0.212         |
|                            | Year      | -0.252        | -----  | 0.230     | 0.170         | 0.206  | -0.106       | -0.161        |
|                            | Serogroup | 0.351         | 0.230  | -----     | -0.309        | -0.168 | -0.002       | -0.051        |
|                            | CTX       | <b>-0.778</b> | 0.170  | -0.309    | -----         | 0.146  | -0.157       | -0.238        |
|                            | Chi       | -0.105        | 0.206  | -0.168    | 0.146         | -----  | 0.069        | 0.047         |
|                            | TF        | 0.088         | -0.106 | -0.002    | -0.157        | 0.069  | -----        | 0.072         |
|                            | Killing   | 0.212         | -0.161 | -0.051    | -0.238        | 0.047  | 0.072        | -----         |
| Clinical only              | Year      | N/A           | -----  | 0.261     | -0.025        | 0.373  | -0.030       | 0.008         |
|                            | Serogroup | N/A           | 0.261  | -----     | -0.212        | 0.205  | 0.042        | 0.205         |
|                            | CTX       | N/A           | -0.025 | -0.212    | -----         | -0.036 | -0.366       | <b>-1.000</b> |
|                            | Chi       | N/A           | 0.373  | 0.205     | -0.036        | -----  | 0.013        | 0.015         |
|                            | TF        | N/A           | -0.030 | 0.042     | -0.366        | 0.013  | -----        | <b>0.681</b>  |
|                            | Killing   | N/A           | 0.008  | 0.205     | <b>-1.000</b> | 0.015  | <b>0.681</b> | -----         |
| Environmental only         | Year      | N/A           | -----  | 0.641     | -0.089        | -0.547 | -0.231       | -0.280        |
|                            | Serogroup | N/A           | 0.641  | -----     | -0.005        | -0.334 | -0.090       | -0.174        |
|                            | CTX       | N/A           | -0.089 | -0.005    | -----         | 0.155  | -0.048       | -0.128        |
|                            | Chi       | N/A           | -0.547 | -0.334    | 0.155         | -----  | 0.123        | 0.088         |
|                            | TF        | N/A           | -0.231 | -0.090    | -0.048        | 0.123  | -----        | 0.071         |
|                            | Killing   | N/A           | -0.280 | -0.174    | -0.128        | 0.088  | 0.071        | -----         |
